# Supplementary material
Source: PubMed Central journal article supplement (PMC4713368)
Supplement: NIHMS709847-supplement-Supp_TableS1.pdf [file NIHMS709847-supplement-Supp_TableS1.pdf]

**Supplemental Table 1: Differential expression of candidate FXR-regulated genes in whole liver RNAseq studies**

| Gene Symbol    | p-value                 | Fold Change             | p-value                 | Fold Change             |
|----------------|-------------------------|-------------------------|-------------------------|-------------------------|
|                | KO SC-435 vs KO control | KO SC-435 vs KO control | WT SC-435 vs WT control | WT SC-435 vs WT control |
| <i>Abcb1a</i>  | 0.000                   | -6.990                  | 0.148                   | -1.561                  |
| <i>Abcb4</i>   | 0.069                   | -1.196                  | 0.732                   | 1.094                   |
| <i>Abcb11</i>  | 0.277                   | 1.749                   | 0.91                    | 0                       |
| <i>Abcc2</i>   | 0.168                   | -1.105                  | 0.725                   | 1.171                   |
| <i>Angptl3</i> | 0.011                   | 1.395                   | 0.105                   | 1.580                   |
| <i>Apoa1</i>   | 0.004                   | 1.484                   | 0.914                   | 1.030                   |
| <i>Apoc1</i>   | 0.001                   | 1.829                   | 0.829                   | 1.097                   |
| <i>Apoc2</i>   | 0.011                   | -2.244                  | 0.514                   | -1.153                  |
| <i>Apoc3</i>   | 0.019                   | 1.761                   | 0.836                   | -1.076                  |
| <i>Apoc4</i>   | 0.007                   | 1.893                   | 0.914                   | 1.053                   |
| <i>Apoe</i>    | 0.009                   | 1.769                   | 0.983                   | -1.009                  |
| <i>Baat</i>    | 0.005                   | 1.465                   | 0.101                   | 1.316                   |
| <i>C3</i>      | 0.176                   | 1.160                   | 0.985                   | 1.005                   |
| <i>Camp</i>    | 0.000                   | 1.292                   | 0.605                   | 1.040                   |
| <i>Car12</i>   | 0.000                   | 1.292                   | 0.605                   | 1.040                   |
| <i>Cyp2a4</i>  | 0.174                   | 3.645                   | 0.493                   | -1.199                  |
| <i>Cyp7a1</i>  | 0.002                   | 9.038                   | 0.031                   | 13.939                  |
| <i>Cyp8b1</i>  | 0.000                   | 170.120                 | 0.028                   | 3.877                   |
| <i>Ddah1</i>   | 0.029                   | -1.609                  | 0.026                   | -1.649                  |
| <i>Edn1</i>    | 0.005                   | 1.252                   | 0.605                   | 1.040                   |
| <i>Fabp6</i>   | 0.000                   | 1.292                   | 0.605                   | 1.040                   |
| <i>Fas</i>     | 0.228                   | 1.201                   | 0.911                   | 1.034                   |
| <i>Fbp1</i>    | 0.001                   | 2.402                   | 0.192                   | 1.313                   |
| <i>Fga</i>     | 0.010                   | 1.728                   | 0.131                   | -1.153                  |
| <i>Fgb</i>     | 0.056                   | 1.334                   | 0.132                   | -1.183                  |
| <i>Fgf15</i>   | 0.000                   | 1.292                   | 0.605                   | 1.040                   |
| <i>Fgg</i>     | 0.008                   | 1.702                   | 0.149                   | -1.274                  |
| <i>G6pc</i>    | 0.019                   | 7.292                   | 0.734                   | -1.210                  |
| <i>Gsk3b</i>   | 0.379                   | -1.076                  | 0.059                   | 1.386                   |
| <i>Hmgcl</i>   | 0.002                   | 1.866                   | 0.880                   | 1.043                   |
| <i>Hnf4a</i>   | 0.217                   | 1.160                   | 0.927                   | -1.029                  |
| <i>Icam1</i>   | 0.004                   | -2.194                  | 0.011                   | -1.306                  |
| <i>Il18</i>    | 0.013                   | 1.524                   | 0.744                   | -1.108                  |
| <i>Insig2</i>  | 0.173                   | -1.289                  | 0.042                   | -1.890                  |
| <i>Kng1</i>    | 0.006                   | 1.220                   | 0.850                   | 1.027                   |
| <i>Nfkb1</i>   | 0.365                   | -1.066                  | 0.513                   | 1.067                   |
| <i>Nos2</i>    | 0.000                   | 1.292                   | 0.605                   | 1.040                   |
| <i>Nos3</i>    | 0.000                   | 1.292                   | 0.605                   | 1.040                   |
| <i>Nr0b2</i>   | 0.014                   | -2.863                  | 0.429                   | -1.634                  |
| <i>Nr5a2</i>   | 0.137                   | 1.154                   | 0.863                   | 1.047                   |

|                |       |        |       |        |
|----------------|-------|--------|-------|--------|
| <i>Pck1</i>    | 0.912 | -1.037 | 0.297 | -1.697 |
| <i>Pdk4</i>    | 0.003 | 3.098  | 0.151 | 2.497  |
| <i>Pltp</i>    | 0.007 | -2.285 | 0.074 | 2.692  |
| <i>Pon1</i>    | 0.001 | 9.350  | 0.244 | 1.181  |
| <i>Ppara</i>   | 0.003 | 2.132  | 0.460 | -1.162 |
| <i>Scarb1</i>  | 0.830 | -1.050 | 0.772 | -1.105 |
| <i>Sdc1</i>    | 0.902 | -1.014 | 0.136 | 1.575  |
| <i>Slc10a1</i> | 0.004 | 2.692  | 0.453 | 1.080  |
| <i>Slc10a2</i> | 0.139 | -1.510 | 0.206 | 1.697  |
| <i>Slc22a7</i> | 0.019 | 4.126  | 0.338 | -1.349 |
| <i>Slc27a5</i> | 0.001 | 2.518  | 0.243 | 1.330  |
| <i>Slc2a4</i>  | 0.084 | 1.199  | 0.605 | 1.040  |
| <i>Slc40a1</i> | 0.018 | -1.386 | 0.390 | -1.449 |
| <i>Srebf1</i>  | 0.141 | 1.629  | 0.856 | -1.106 |
| <i>Sult2a1</i> | 0.384 | 6.454  | 0.100 | 1.422  |
| <i>Vcam1</i>   | 0.003 | -3.202 | 0.334 | -1.379 |
| <i>Vldlr</i>   | 0.017 | 1.230  | 0.111 | 1.399  |

---
